# Book Reviews

Burnell R. Brown Jr., M.D., Ph.D., Editor

**Manual of Pulmonary Function Testing.** By GREGG RUPPEL. St. Louis, C. V. Mosby, 1979. Pages; 162. Price: \$9.95.

The author's stated intention is to present a concise explanation of the commonly used pulmonary function tests, the testing techniques, and the significance of each test in regard to generalized disease processes. He has successfully achieved most of these goals.

This manual is intended to be a handy reference for technicians and physicians who want to learn pulmonary function testing.

The book is divided into eight chapters that cover most of the commonly used pulmonary function tests. The presentation of the material presumes that the reader has a basic knowledge of the pulmonary anatomy and physiology. The text of each chapter is easy to read, adequately illustrated, and well referenced.

Each test is described under three subheadings: description, technique, and significance. The description gives a brief definition of the test. The technique section is sufficient to familiarize a beginner with the tests but is inadequate for him to carry out tests without further instructions. The significance section deals with the application of the test in regard to the disease process, although an adequate physiologic explanation of the abnormal test is lacking.

The last chapter deals with the equipment used in the pulmonary function laboratory and describes different types of spirometers, pneumotachs, gas analyzers, plethysmographs, and various other recording devices. This information is not always available from the standard respiratory physiology textbooks and may be useful to the physician planning to set up a pulmonary function laboratory. The appendix includes some useful information, such as prediction regressions for most of the pulmonary function tests, and also references and some of the commonly used equations.

This book will be most useful to technicians, respiratory therapists, and physicians who wish a basic introduction to pulmonary function testing. The book may also be useful to those individuals who wish to set up a pulmonary function laboratory. One must realize that this book is not a substitute for a standard pulmonary physiology textbook; however, a copy of this book should be a useful reference in most pulmonary function laboratories.

NIRMAL B. CHARAN, M.D.  
JOHN BUTLER, M.D.  
*Division of Head Respiratory Diseases, RM-12  
University of Washington School of Medicine  
Seattle, Washington 98195*

**Principles of Clinical Electrocardiography.** Tenth edition. By M. J. GOLDMAN. Los Altos, Lange Medical Publications, 1979. Pages 415. Price: \$12.00.

The popularity of this book is evident from the number of editions that have appeared since the first one in 1956. The author's purpose, to present the basic concepts of electrocardiography and their clinical applications, is achieved in a straightforward and comprehensive, but not exhaustive, treatment of the subject. As with former editions, emphasis is placed on the unipolar (augmented extremity, precordial, and esophageal) leads. This approach is particularly useful in understanding resultant normal and abnormal electrocardiographic patterns and provides the logical introduction to vector analysis. Revisions have been made in the sections related to exercise tests and the preexcitation syndromes.

The first four chapters deal with basic cardiac electrophysiology in a sufficiently detailed, but not overly complex, manner. Unfortunately, no mention is made in chapter 2 ("Electrophysiology of

the Heart") of calcium-dependent, slow-channel depolarization, also referred to as the slow response. The slow response is responsible for the plateau phase of the action potential seen in atrial and ventricular muscle and Purkinje fibers and for the more rounded action potential contour of pacemaker cells found within the SA and AV nodes. The slow response is thought to be important for the genesis of arrhythmias due to reentry of excitation and has been implicated as partially responsible for triggered arrhythmias resulting from oscillatory afterpotentials. Indeed, specific slow-channel blocking drugs (verapamil, D-600) have been shown to be effective antiarrhythmic agents.

Chapters 5 through 11 deal with normal and abnormal electrocardiographic patterns. They are practical, well written, and well illustrated, and are "must" reading for practitioners with limited experience in reading ECGs, especially those who do not have the readily available services of a cardiologist to interpret ECGs in urgent or emergent situations. As the author repeatedly points out, "The ECG must always be interpreted in conjunction with the clinical findings." Presumably, the anesthesiologist is well acquainted with those. The author goes on to say, "In general, the person best qualified to interpret the ECG is the physician caring for the patient." Thus, chapters 5 through 11 are an important prerequisite to understanding ischemia and infarction patterns and arrhythmias discussed in later chapters.

Chapters 10 and 11, which deal with ECG patterns in myocardial ischemia and infarction, will be particularly helpful for anesthesiologists, since we are increasingly faced with providing care for patients with underlying coronary artery disease. These chapters are well organized and well illustrated.

Chapters 12 through 15, which deal with arrhythmias, A-V conduction block and preexcitation syndromes, will be of the most interest to anesthesiologists. Some deficiencies are apparent. Tables 12-1 and 12-3, which summarize antiarrhythmic drug action, should have included bretylium tosylate and disopyramide, antiarrhythmic drugs recently approved by the FDA for clinical use. In addition, a table summarizing principal indications for the different antiarrhythmic drugs should have been provided. The author's discussion of the sick-sinus syndrome (p 219) should be expanded. Additional illustrations, as well as a more detailed discussion of the current medical management, are warranted. I point this out for two reasons; 1) the sick-sinus syndrome is today probably the most common indication for instituting pacemaker therapy, and 2) drugs used in anesthetic practice have incompletely understood and potentially dangerous effects in patients with this syndrome, particularly those with bradycardia alternating with periods of tachycardia (bradycardia-tachycardia syndrome).

Chapters 13 ("Disturbances of Atrioventricular Conduction") and 14 ("The Ventricular Arrhythmias") are good. In the discussion related to atrioventricular dissociation (pp 214-215) in chapter 15 ("The Pararrhythmias"), the distinction between A-V block and A-V dissociation could have been made more clear. A-V dissociation is not an uncommon arrhythmia, although the author suggests that it is. A-V dissociation is frequently seen in the operating room, even in healthy patients, when potent inhalational agents are used as primary anesthetics. The loss of the normal atrial contribution to ventricular filling may lead to significant reductions in cardiac output. Whereas the electrocardiographic patterns of preexcitation syndromes (chapter 16) are of no clinical significance in themselves, the recognition of them is, since individuals with these patterns are prone to paroxysmal attacks of supraventricular tachycardia. Such attacks may occur during anesthesia, although cause-and-effect relationships are unknown at present.

Chapter 18 ("Miscellaneous Abnormal Electrocardiographic Patterns") is of practical importance to anesthesiologists but is somewhat selective. This section could be expanded to include more discussion of drug effects on the ECG. The major electrolyte imbalances are included and adequately dealt with. Chapter 19, which deals with cardiac pacing and defibrillation, should have included more discussion of pacemaker failure, its causes, and recognition and management of it. Chapter 20 ("An Introduction to Spatial Vectorcardiography") will be of minimal interest to most anesthesiologists, but serves as a good introduction to spatial vectorcardiography.

The self-study section on interpretation of the ECG is particularly valuable as a review. Separation of the practice ECGs from the author's own interpretation would have better served this purpose. The first appendix summarizes principal features of the normal ECG and more common abnormalities; the second appendix provides a guide to the evaluation of ECG abnormalities. The appendices are excellent summaries of material covered in the text. The references could be expanded and updated, particularly for the reader who wishes to pursue further the subject of electrocardiography. More emphasis should be on current books, monographs, and reviews, with less emphasis on outdated original articles.

Overall, I was impressed with the conciseness and clarity of presentation. The material is well organized, and the quality of the illustrations is excellent. This book will appeal primarily to undergraduate and postgraduate physicians and to practitioners requiring a basic review of the subject. It fills the void between simplified primers and more sophisticated texts on the subject.

JOHN L. ATLEE, M.D.  
Department of Anesthesiology  
Clinical Science Center  
University of Wisconsin-Madison  
Madison, Wisconsin 53792

**Biofeedback—Principles and Practice for Clinicians.** EDITED BY JOHN V. BASMAJIAN. Baltimore, Williams and Wilkins, 1979. Pages: 282. Price: \$29.00.

This volume consists of 21 chapters by authors with both clinical and research expertise in various areas of biofeedback. As stated by its editor, the purpose of this volume is to present the state of the art in biofeedback application.

Specific biofeedback strategies in the treatment of headache syndromes, muscle spasms, muscle reeducation problems, spasticity, cardiovascular dysfunction, and various psychosomatic disorders (insomnia and phobias) are included in this comprehensive review, but it is not a step-by-step cookbook for teaching biofeedback applications. A particular strength of the volume is its integration of research and clinical knowledge, as evidenced by the excellent review of the anatomic and physiologic background of biofeedback (chapter 2). Similarly, the systematic and thorough descriptions of the treatment of spasticity (chapter 6) and total-hand rehabilitation (chapter 4) combine clinical experience and research data in presenting the current biofeedback techniques applicable to these muscular disorders. Most of the chapters are generously accompanied by references to technical articles and by bibliographies, facilitating the reader's acquisition of more specific and complete biofeedback techniques.

An additional strength of this volume is that it does *not* proselytize biofeedback, but provides a "cautious, optimistic review of clinical

biofeedback which is both scientifically correct and ethical." Appropriately, the final chapter is titled "Research and Feedback in Clinical Practice: A Commentary on Responsible Biofeedback Therapy," and the need for continued research and scientific inquiry in the relatively new area of biofeedback application is stressed. Most of the chapters cite contraindications as well as indications for specific biofeedback applications, and concise reference to efficacious biofeedback strategies generates a refreshing style, as indicated by the following quotations:

Frontal EMG feedback is an effective procedure for the alleviation or the elimination of muscle contraction (tension) headache [p 138].

Our experience and that of other researchers has been that EMG feedback from the masseter muscle or frontal (forehead) region improves patient ability to recognize and stop bruxism [p. 191].

The frequency range used for EMG feedback work is typically from 100–1000 hertz [p. 270].

These statements are generally backed by a series of references and research findings, and the reader is encouraged to draw his or her own conclusions based on the data presented.

As would be anticipated in a comprehensive volume, there are occasional overly optimistic references to biofeedback's efficacy. Specifically, the statements that biofeedback technology offers promise in the treatment of low back pain or spasmodic torticollis occur in the absence of controlled studies demonstrating this. This is not entirely the fault of the authors, since the state of the art in some biofeedback areas remains based on clinical case reports.

Whereas these deficiencies are minor, there is one major drawback of this volume that could have been avoided. This occurs in the review of psychosomatic disorders (chapter 14). The primary problem with this chapter is its reliance on a narrow, conceptual framework—specifically, a psychoanalytic one—in defining psychosomatic illness. While this does not necessarily present major problems in an individual case (for example, conversion reaction paralysis is a documented entity, and biofeedback can provide information to the patient that there is no organic basis for paralysis), this framework does not adequately explain many of the psychosomatic disorders related to muscle conditioning, anxiety-induced spasms, and conditioned avoidance parameters (*e.g.*, hypertension specific facial tics, and phobias). Furthermore, this chapter provides the least scientific evidence for statements made about the connection between biofeedback and psychosomatic disorders, and I would have found it useful for the authors to review more thoroughly the specific biofeedback applications to psychosomatic disorders, as has been done elsewhere (*cf.*, Schwartz, 1977). However, this deficit is partially replenished by a stimulating presentation of the issues of the diagnosis and patient selection for different biofeedback modalities (chapter 13), and by a thorough review and description of general relaxation techniques used in the clinical setting (chapter 8).

In conclusion, this volume represents a cross section of the current state of the art in biofeedback technology. Despite some of the shortcomings and deficiencies to be expected in any volume dealing with a relatively new scientific area, this book is timely and useful in providing a review of the area of clinical biofeedback application. Furthermore, Basmajian includes chapters on all aspects of the application of biofeedback, from anatomy and instrumentation to psychotherapy and ethical considerations. In this volume, the health care professional will find a review and detailed explanation of the applications for biofeedback technology that provide sufficient knowledge to make appropriate referrals, as
